# Supplementary material for: Educational Disparity in Drinking and Smoking in Japan for 2013–2019: a Cross-sectional Study
Source: Research Square preprint supplement (doi:10.21203/rs.3.rs-1109069/v1), 2021-12-13
Supplement: Supplementary file 2 [file cdee5d57fb65ac902b77ca5c.docx]

S2 Table. Current smoking prevalence (%) (2013–2019)

NS: not shown because the sample size was <100.

NS: not shown because the sample size was <100.

NS: not shown because the sample size was <100.
